# Supplementary material for: First Trimester Maternal Plasma Aberrant miRNA Expression Associated with Spontaneous Preterm Birth
Source: MDPI journal article supplement (doi:10.3390/ijms232314972), 2022-11-29
Supplement: s1 [file s1]

**Supplement S1. MiRNAs with significant altered expression in the 1<sup>st</sup> trimester maternal plasma of women who later delivered preterm compared to term deliveries**

|                       |                         | Tag Count |          | sPTD vs Controls |         |       |
|-----------------------|-------------------------|-----------|----------|------------------|---------|-------|
| MATURE-ID             | MATURE-SEQ              | sPT       | Controls | Fold change      | p value | FDR   |
| <i>Up-regulated</i>   |                         |           |          |                  |         |       |
| hsa-miR-4732-5p       | UGUAGAGCAGGGAGCAGGAAGCU | 102.6     | 60.      | 1.70             | 0.04812 | 0.666 |
| <i>Down regulated</i> |                         |           |          |                  |         |       |
| hsa-miR-23b-5p        | UGGGUUCCUGGCAUGCUGAUUU  | 14.2      | 23.6     | 0.60             | 0.04751 | 0.666 |
| hsa-miR-125a-3p       | ACAGGUGAGGUUCUUGGGAGCC  | 24.6      | 41.2     | 0.59             | 0.01435 | 0.666 |
